# Supplementary material for: Bee pollination increases yield quantity and quality of cash crops in Burkina Faso, West Africa
Source: PubMed Central journal article supplement (PMC5735132; doi:10.1038/s41598-017-17970-2), 2017-12-18
Supplement: 41598_2017_17970_MOESM1_ESM.pdf [file 41598_2017_17970_MOESM1_ESM.pdf]

# **Bee pollination increases yield quantity and quality of cash crops in Burkina Faso, West Africa**

Katharina Stein<sup>1,4\*</sup>, Drissa Coulibaly<sup>2</sup>, Kathrin Stenchly<sup>3</sup>, Dethardt Goetze<sup>4</sup>, Stefan Porembski<sup>4</sup>, André Lindner<sup>5</sup>, Souleymane Konaté<sup>2</sup> and K. Eduard Linsenmair<sup>1</sup>

<sup>1</sup>*Biocenter, Department of Animal Ecology and Tropical Biology, University of Wuerzburg, Wuerzburg, Germany; katharina.stein@uni-wuerzburg.de; ke\_lins@biozentrum.uni-wuerzburg.de*

<sup>2</sup>*Unité de Formation et de Recherche des Sciences de la Nature, Unité de Recherche en Ecologie et Biodiversité, Université Nangui Abrogoua Abidjan, Côte d'Ivoire; coulibalydriss2008@yahoo.fr; konatesoul\_sn@una.edu.ci*

<sup>3</sup>*Faculty of Organic Agricultural Sciences, Universität Kassel, Germany; stenchly@uni-kassel.de*

<sup>4</sup>*Institute of Biological Sciences, Department of Botany and Botanical Garden, University of Rostock, Rostock, Germany; dethardt.goetze@uni-rostock.de; stefan.porembski@uni-rostock.de; katharina.stein@uni-rostock.de*

<sup>5</sup>*Centre for International Postgraduate Studies of Environmental Management – CIPSEM, Technische Universität Dresden, Dresden, Germany; andre.lindner@tu-dresden.de*

1 **Supporting information**

2 **Table S1. Pollination treatments** to determine the breeding systems of conventional upland  
 3 cotton (*Gossypium hirsutum*) and sesame (*Sesamum indicum*). Treatments were  
 4 implemented on 100 flowers (each 2 flowers per treatment per 50 plants) per crop species  
 5 on 1 field each. For the pollinator dependence experiments, test no. 1 (OPEN), 2 (SELF) and  
 6 5 (CROSS) were conducted on 11 fields per crop species (n = 550 flowers/test). According to  
 7 Dafni (1992), modified.

8

9

| Test                                                           | Treatment |             |                                                     | Remarks                                                    |
|----------------------------------------------------------------|-----------|-------------|-----------------------------------------------------|------------------------------------------------------------|
| 1 control (C) , OPEN                                           | unbagged  | untreated   | free pollination                                    | evaluation of pollination rate<br>under natural conditions |
| 2 spontaneous self-<br>pollination (SS), SELF                  | bagged    | untreated   | pollen source: same<br>flower                       | measuring need for<br>pollinators                          |
| 3 hand self-<br>pollination (HS)                               | bagged    | emasculated | pollen source: different<br>flower of same plant    | indication of self-<br>(in)compatibility systems           |
| 4 hand cross-<br>pollination (HC)                              | bagged    | emasculated | pollen source: min.10<br>other individuals of genet | indication (with no. 3) of<br>self-(in)compatibility       |
| 5 cross-pollination under<br>natural conditions (OC),<br>CROSS | unbagged  | emasculated | free pollination                                    | evaluation of selfing-rate<br>with no.1 and 2              |

10

11

12

**Table S2. Most abundant pollinator species of cotton and sesame and their effectiveness** in terms of fruit set and quality parameters (n = 300 flowers/crop). Values indicate mean  $\pm$  SD. Only pollinator species that initiated fruit set are listed. *Apis mellifera* is a partly managed honeybee species, all other named bees are wild bees. Very low number of visits were recorded for the remaining seventeen wild bee species and four wasp species (Scoliidae) not named individually. They were grouped.

| Pollinator species              | n visits | fruit set [%]     | Reproductive parameters |                    | seed weight [g] | fibre weight [g] |
|---------------------------------|----------|-------------------|-------------------------|--------------------|-----------------|------------------|
|                                 |          |                   | n intact seeds          | n non-intact seeds |                 |                  |
| <b>cotton</b>                   |          |                   |                         |                    |                 |                  |
| <i>Apis mellifera</i>           | 150      | 63.33 $\pm$ 48.35 | 30.21 $\pm$ 05.02       | 2.87 $\pm$ 2.48    | 3.73 $\pm$ 0.65 | 2.96 $\pm$ 0.52  |
| <i>Tetralonia fraterna</i>      | 59       | 54.24 $\pm$ 50.25 | 31.69 $\pm$ 05.28       | 0.69 $\pm$ 0.82    | 4.15 $\pm$ 0.98 | 3.35 $\pm$ 0.82  |
| <i>Ceratina spec.1</i>          | 15       | 60.00 $\pm$ 50.71 | 19.00 $\pm$ 14.20       | 1.49 $\pm$ 2.23    | 2.09 $\pm$ 1.55 | 1.62 $\pm$ 1.19  |
| <i>Hypotrigona gribodoi</i>     | 11       | 62.50 $\pm$ 49.45 | 15.91 $\pm$ 15.63       | 1.04 $\pm$ 2.01    | 2.06 $\pm$ 1.83 | 1.62 $\pm$ 1.45  |
| other 17 wild bee species       | 66       | 75.61 $\pm$ 43.48 | 20.07 $\pm$ 14.38       | 1.39 $\pm$ 1.73    | 2.39 $\pm$ 1.59 | 1.81 $\pm$ 1.19  |
| Scoliidae - 4 wasp species      | 16       | 87.50 $\pm$ 34.16 | 26.50 $\pm$ 06.58       | 2.36 $\pm$ 3.61    | 2.88 $\pm$ 0.82 | 2.37 $\pm$ 0.46  |
| <b>sesame</b>                   |          |                   |                         |                    |                 |                  |
| <i>Apis mellifera</i>           | 290      | 46.55 $\pm$ 49.97 | 50.99 $\pm$ 19.62       | 2.10 $\pm$ 07.25   | 0.20 $\pm$ 0.07 |                  |
| <i>Chalicodoma mephistolica</i> | 5        | 20.00 $\pm$ 44.72 | 0                       | 46 $\pm$ 20.57     | 0               |                  |
| <i>Hypotrigona gribodoi</i>     | 2        | 50.00 $\pm$ 70.71 | 0                       | 0                  | 0               |                  |

**Table S3. Fruit set and quality parameters of cotton and sesame resulting from pollinator exclusion experiments.** Each 550 flowers from 11 fields per crop species (conventional cotton : *Gossypium hirsutum* ; sesame : *Sesamum indicum*) were subject to the pollination treatments control (no manipulation, OPEN natural pollination), outcross-pollination (emasculatation of flowers, CROSS) and spontaneous self-pollination (exclusion of pollinators, SELF). Values indicate mean  $\pm$  SD.

| Reproductive Parameters | Treatments        |                   |                   |
|-------------------------|-------------------|-------------------|-------------------|
|                         | OPEN              | CROSS             | SELF              |
| <b>cotton</b>           |                   |                   |                   |
| fruit set [%]           | 48.73 $\pm$ 50.02 | 46.36 $\pm$ 49.91 | 37.45 $\pm$ 0.48  |
| n intact seeds          | 25.23 $\pm$ 9.73  | 25.90 $\pm$ 9.33  | 15.87 $\pm$ 6.69  |
| n non-intact seeds      | 2.69 $\pm$ 3.19   | 0.59 $\pm$ 1.74   | 21.07 $\pm$ 13.35 |
| seed weight [g]         | 2.35 $\pm$ 1.11   | 3.03 $\pm$ 1.32   | 1.42 $\pm$ 0.86   |
| fibre weight [g]        | 1.73 $\pm$ 0.81   | 2.22 $\pm$ 1.01   | 1.15 $\pm$ 0.71   |
| germination [%]         | 61.35 $\pm$ 26.78 | 72.16 $\pm$ 23.94 | 47.09 $\pm$ 28.66 |
| <b>sesame</b>           |                   |                   |                   |
| fruit set [%]           | 42.00 $\pm$ 49.39 | 29.50 $\pm$ 45.64 | 18.56 $\pm$ 38.91 |
| n intact seeds          | 51.06 $\pm$ 23.83 | 51.44 $\pm$ 21.35 | 28.16 $\pm$ 20.61 |
| n non-intact seeds      | 4.10 $\pm$ 7.33   | 1.73 $\pm$ 2.49   | 13.71 $\pm$ 12.07 |
| seed weight [g]         | 0.17 $\pm$ 0.09   | 0.24 $\pm$ 0.13   | 0.07 $\pm$ 0.06   |
| fruit weight [g]        | 0.30 $\pm$ 0.10   | 0.34 $\pm$ 0.15   | 0.15 $\pm$ 0.07   |
| germination [%]         | 26.29 $\pm$ 23.17 | 62.16 $\pm$ 37.14 | 0.56 $\pm$ 10.11  |
